# Supplementary material for: Acetonitrile-assisted exfoliation of layered grey and black arsenic: contrasting properties
Source: Royal Society of Chemistry journal article supplement (doi:10.1039/c9na00754g), 2020-01-01
Supplement: c9na00754g1.pdf [file c9na00754g1.pdf]

## SUPPORTING INFORMATION

# Acetonitrile-Assisted Exfoliation of Layered Grey and Black Arsenic: Contrasting Properties

*Nikolas Antonatos<sup>1</sup>, Vlastimil Mazánek<sup>1</sup>, Petr Lazar<sup>2</sup>, Jiri Sturala<sup>1</sup>, Zdeněk Sofer<sup>1,\*</sup>*

<sup>1</sup>Department of Inorganic Chemistry, University of Chemistry and Technology Prague,  
Technická 5, 166 28 Prague 6, Czech Republic

<sup>2</sup>Regional Centre of Advanced Technologies and Materials, Faculty of Science, Palacký  
University Olomouc, tř. 17. listopadu 12, 77 146 Olomouc, Czech Republic.

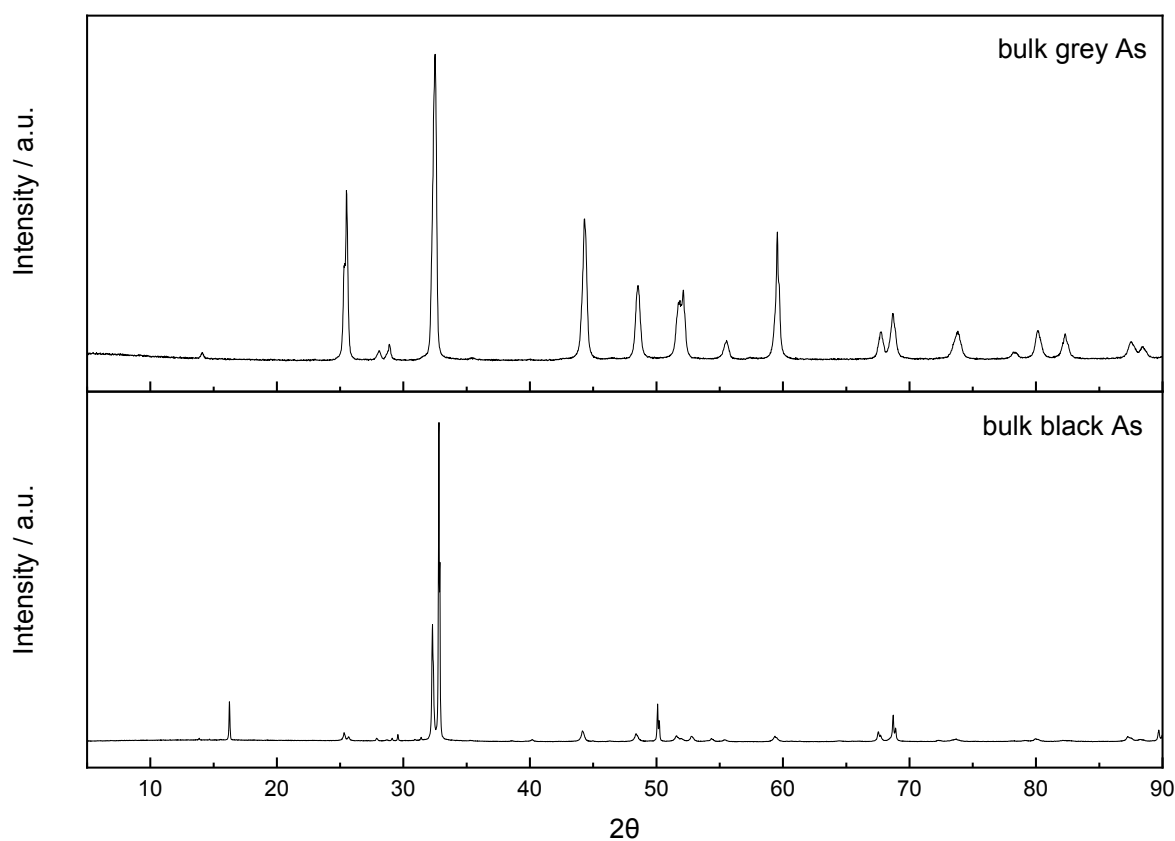

**Figure S1.** Comparison of X-ray diffraction patterns of bulk grey and black arsenic.

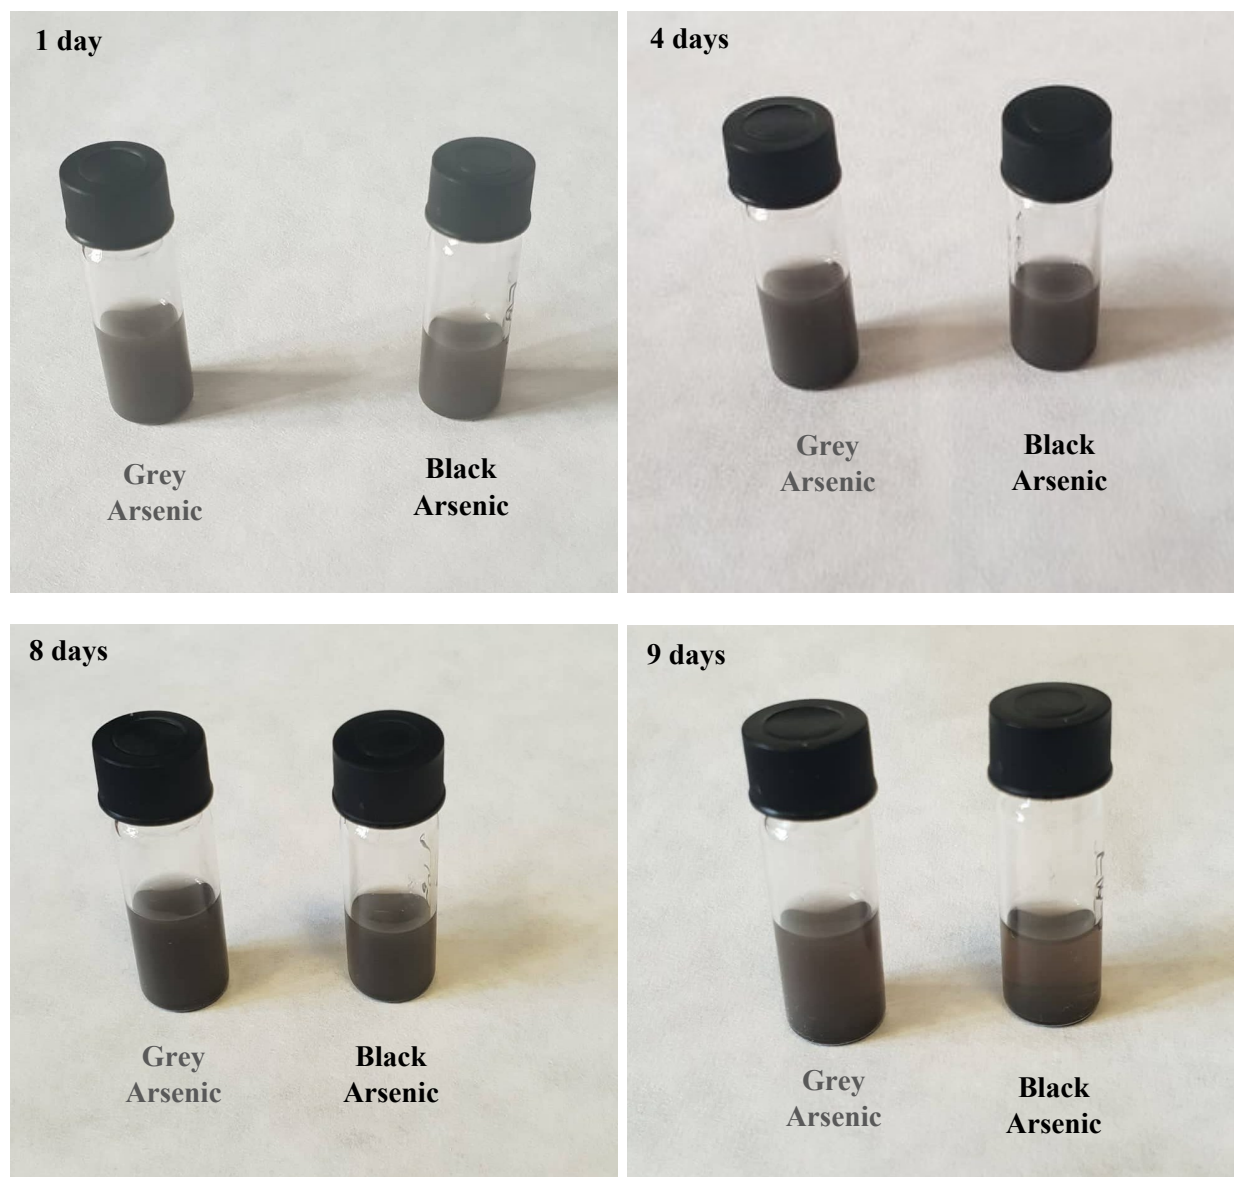

**Figure S2.** Suspensions of exfoliated grey and black arsenic in acetonitrile after 1, 4, 8 and 9 days depicting the ability of acetonitrile to stabilize the dispersions in ambient conditions for a long time (8 days).

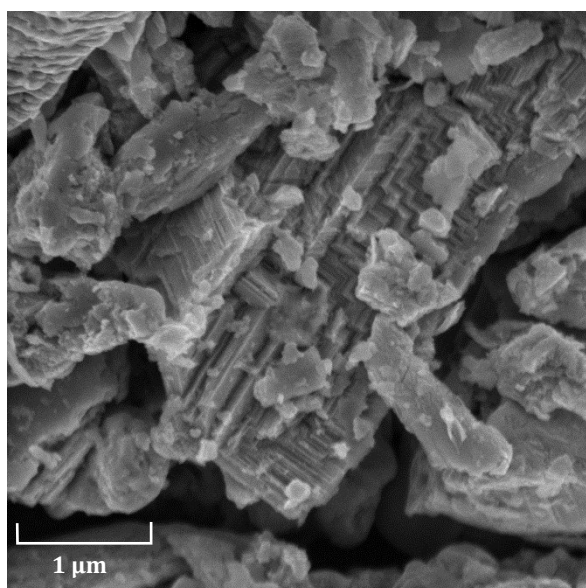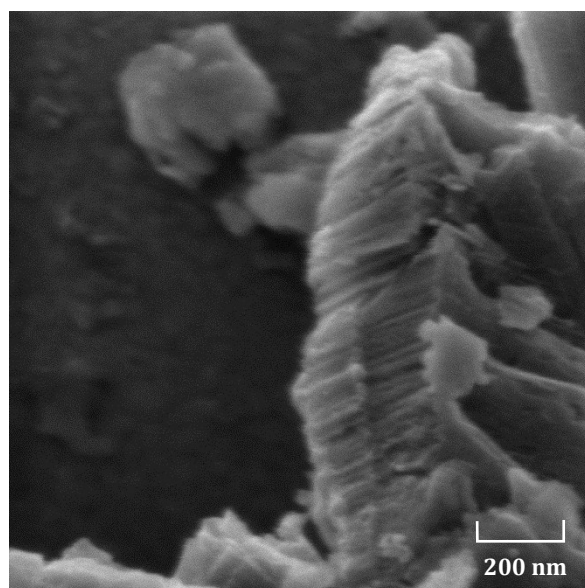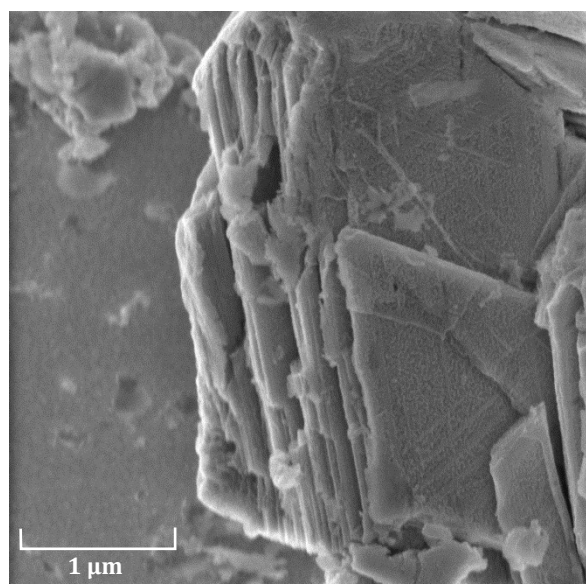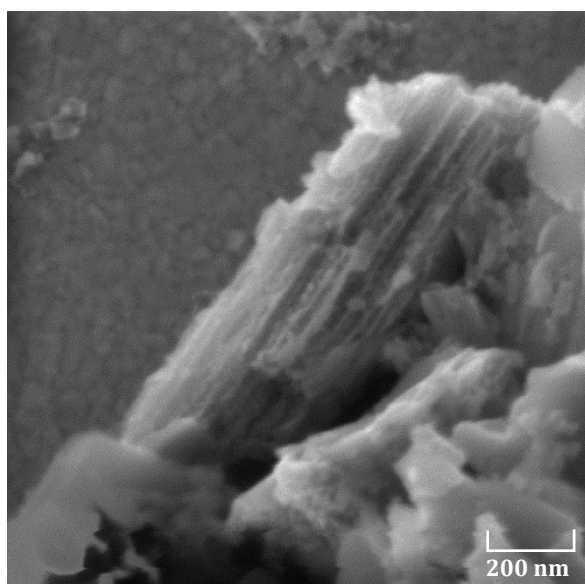

**Figure S3.** SEM images of bulk grey arsenic (**top**) and black arsenic (**bottom**)

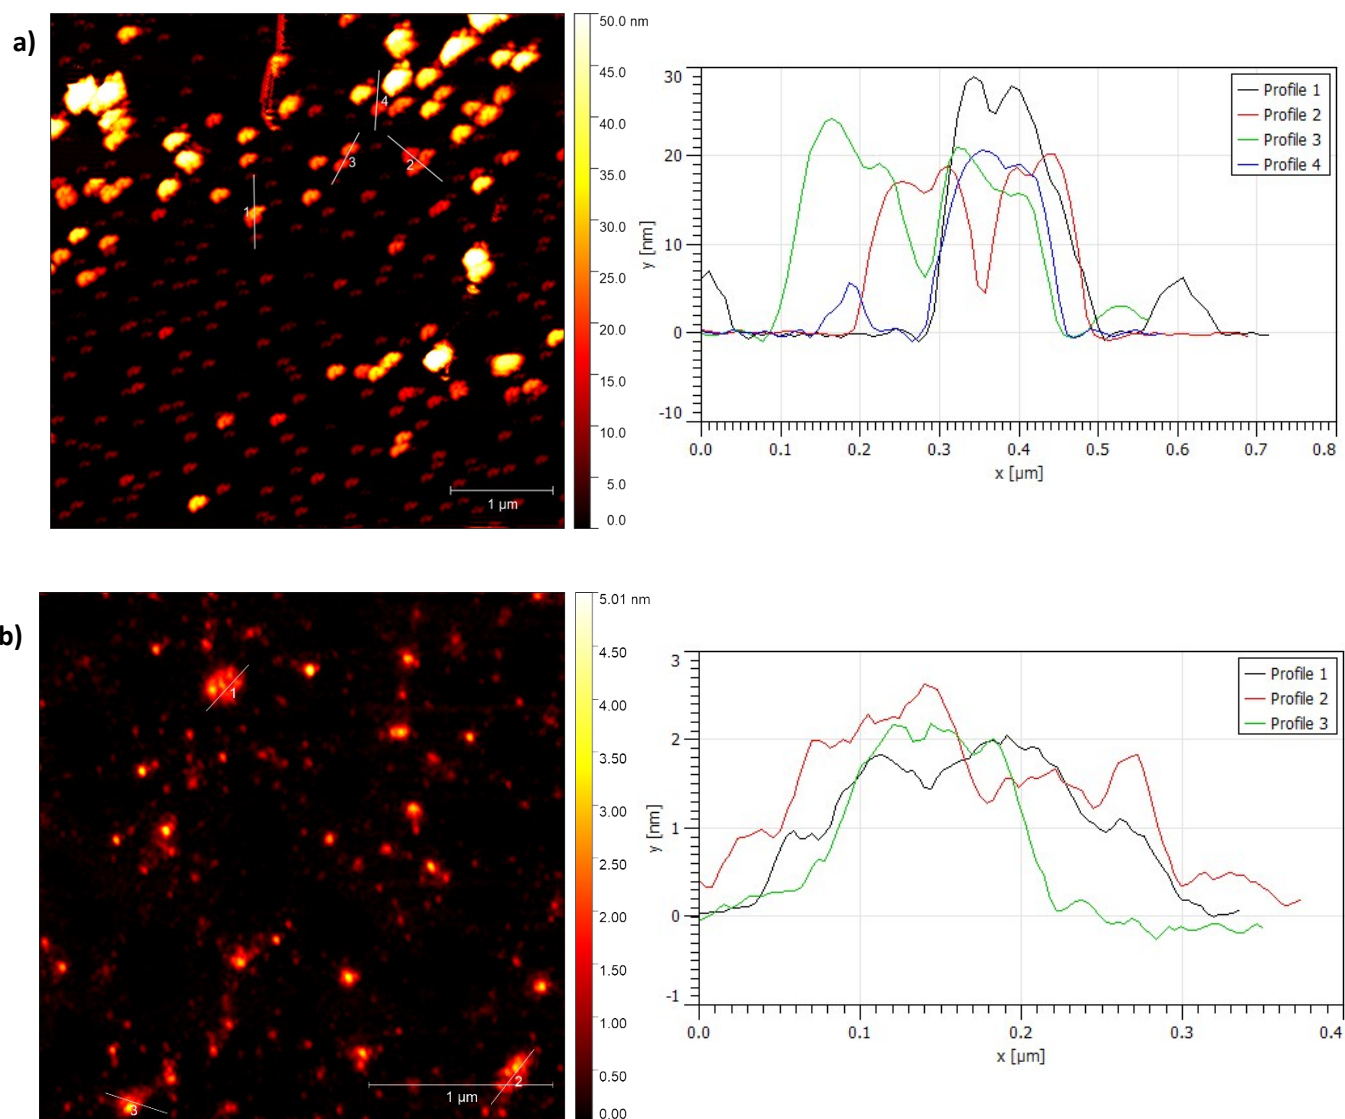

**Figure S4.** AFM images with corresponding height profiles of **a)** grey arsenic and **b)** black arsenic.

**Table S1.** Comparison of bond lengths between atoms and distance between layers for grey and black arsenic.

| Material          | As-As bond length / Å |                 | Interlayer distance / Å |
|-------------------|-----------------------|-----------------|-------------------------|
|                   | Same plane            | Different plane |                         |
| g-As <sup>1</sup> | 2.50                  | 2.53            | 3.52                    |
| b-As <sup>2</sup> | 2.50                  | 2.48            | 5.46                    |

<sup>1</sup> Z. Zhu, J. Guan, D. Tománek, *Phys. Rev. B*, 2015, **91**, 161404(R)

<sup>2</sup> Y. Chen, C. Chen, R. Kealhofer, H. Liu, Z. Yuan, L. Jiang, J. Suh, J. Park, C. Ko, H.S. Choe, J. Avila, M. Zhong, Z. Wei, J. Li, H. Gao, Y. Liu, J. Analytis, Q. Xia, M.C. Asensio and J. Wu, *Adv. Mater.*, 2018, **30**, 1800754

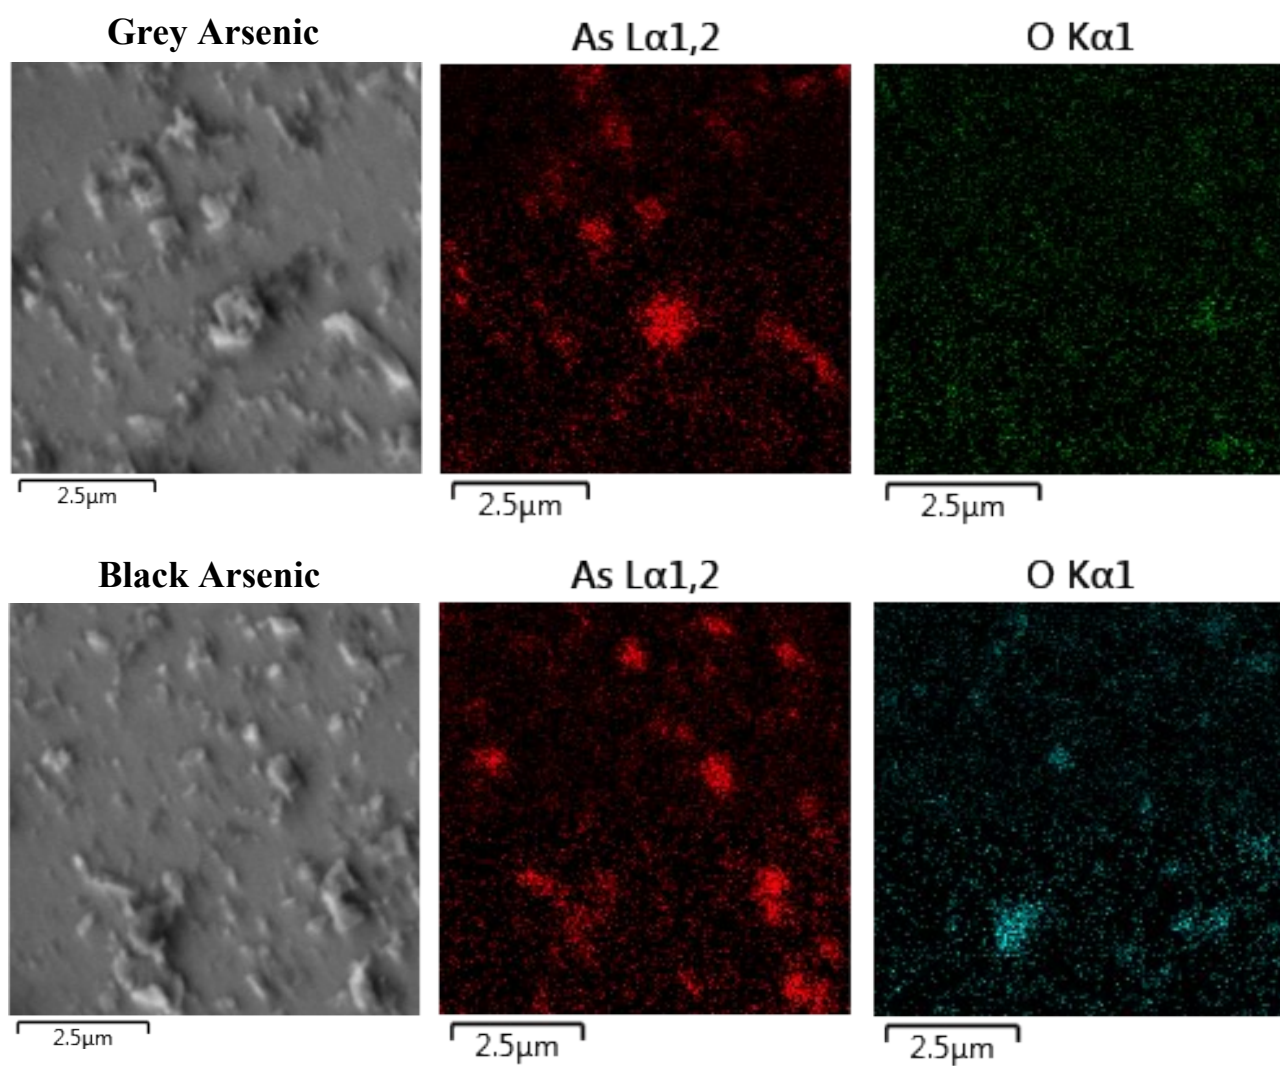

**Figure S5.** SEM images of exfoliated grey (**top**) and black (**bottom**) arsenic with their corresponding EDS elemental maps of arsenic and oxygen.



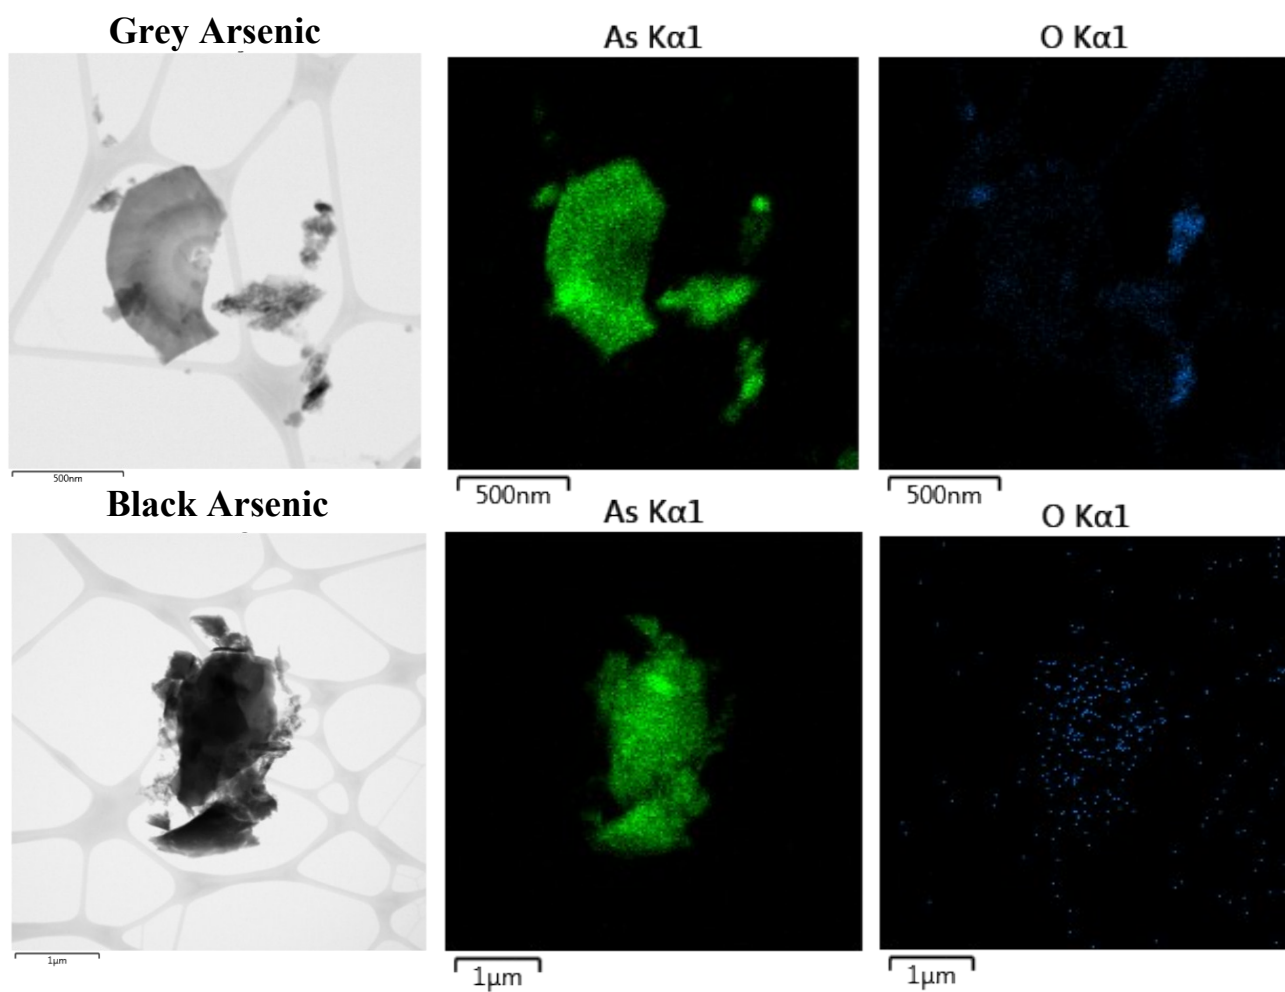

**Figure S6.** TEM images of exfoliated grey (**top**) and black (**bottom**) arsenic with their corresponding EDS elemental maps of arsenic and oxygen.

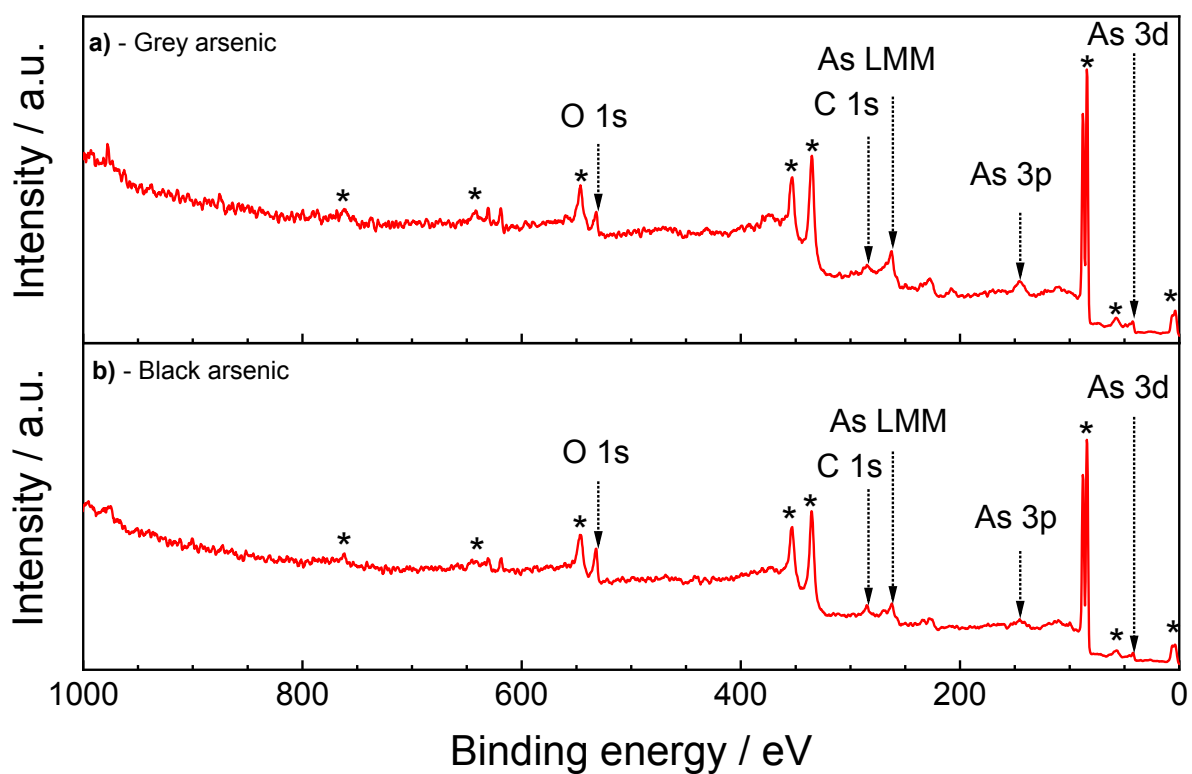

**Figure S7.** Wide survey XPS spectra of **a)** grey and **b)** black arsenic. Marked with an asterisk are signals caused by the Au substrate.

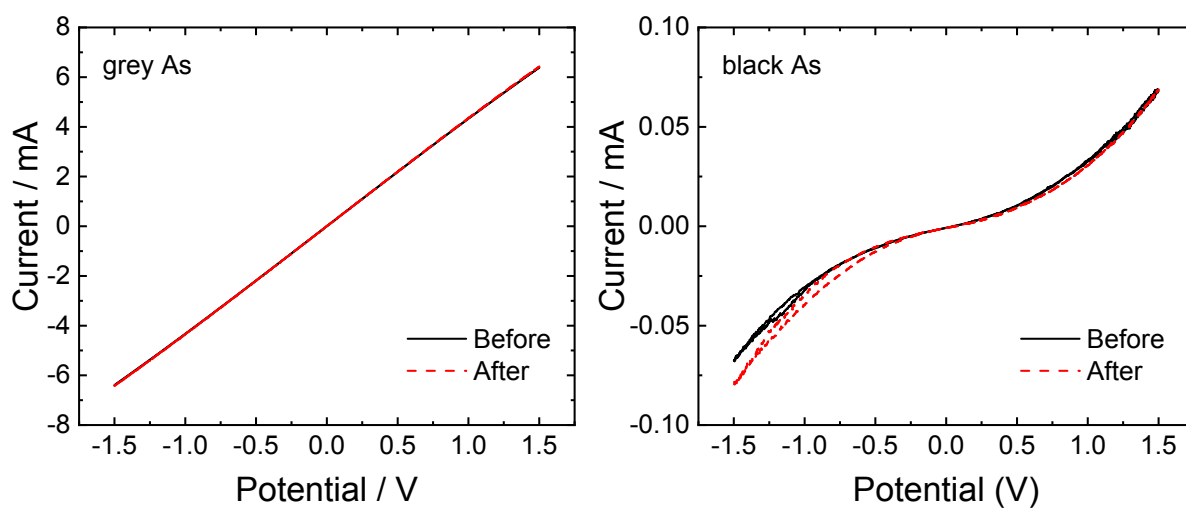

**Figure S8.** I-V curves of modified impedimetric sensors of grey and black arsenic measured before (**black**) and after (**red**) exposure to tested VOCs.

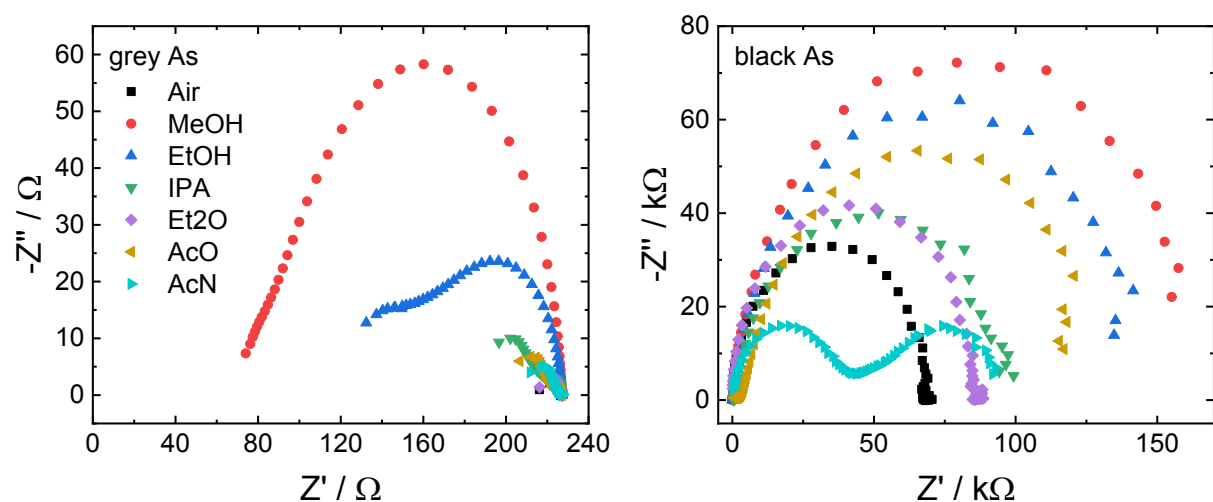

**Figure S9.** Response of impedimetric sensors to various VOCs plotted as Nyquist diagrams.

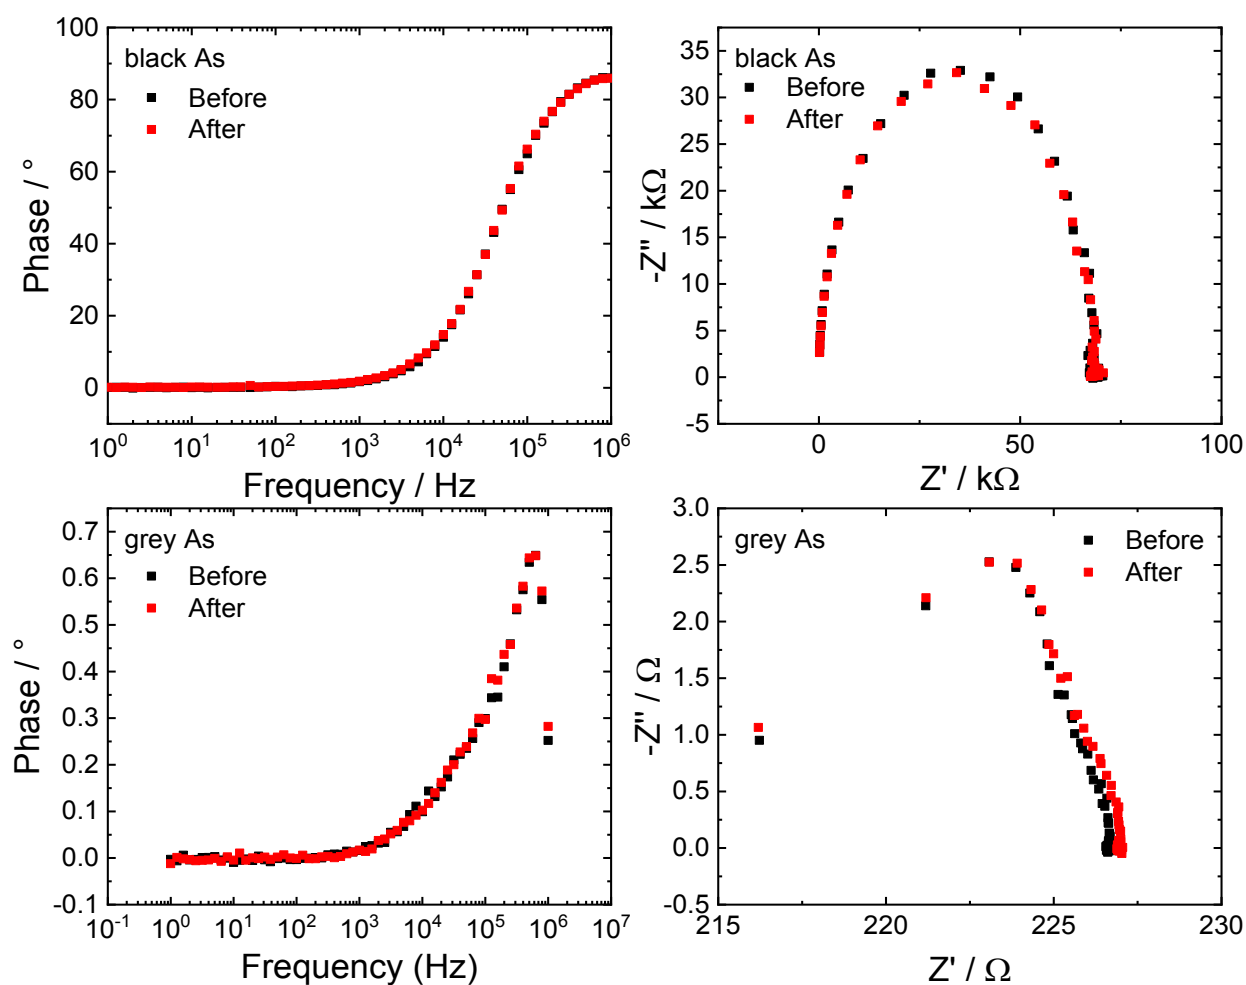

**Figure S10.** Response of the sensors before (**black**) and after (**red**) exposure to all tested VOCs. Left hand graphs are Bode diagrams and Nyquist diagrams are in the right.
